# Supplementary figures and images for: Di-2-pyridyl ketone oxime [(py)2CNOH] in manganese carboxylate chemistry: mononuclear, dinuclear and tetranuclear complexes, and partial transformation of (py)2CNOH to the gem-diolate(2−) derivative of di-2-pyridyl ketone leading to the formation of NO3−
Source: Royal Society of Chemistry journal article supplement (doi:10.1039/b412355g), 2005-01-01

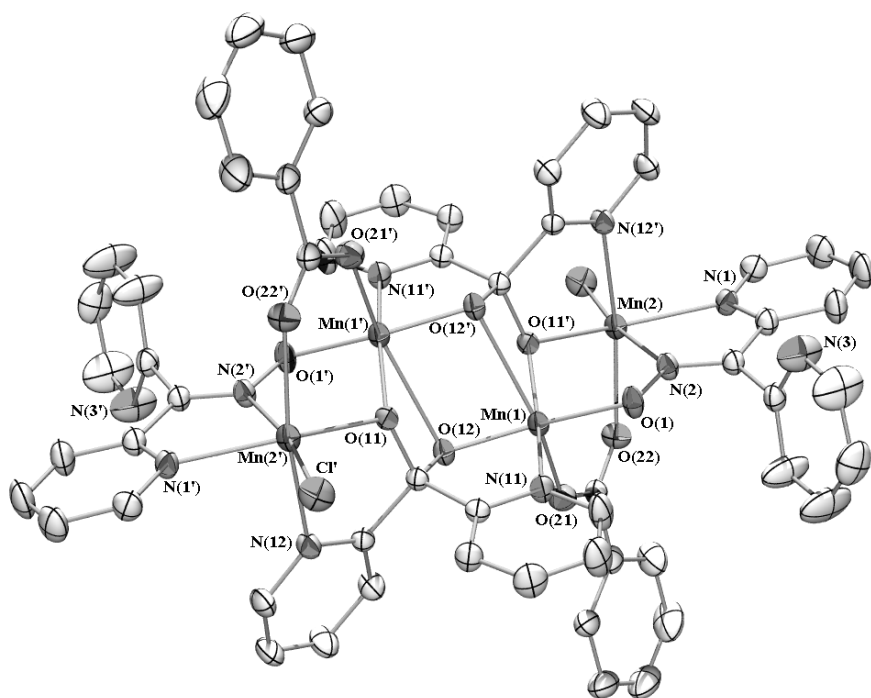

S1

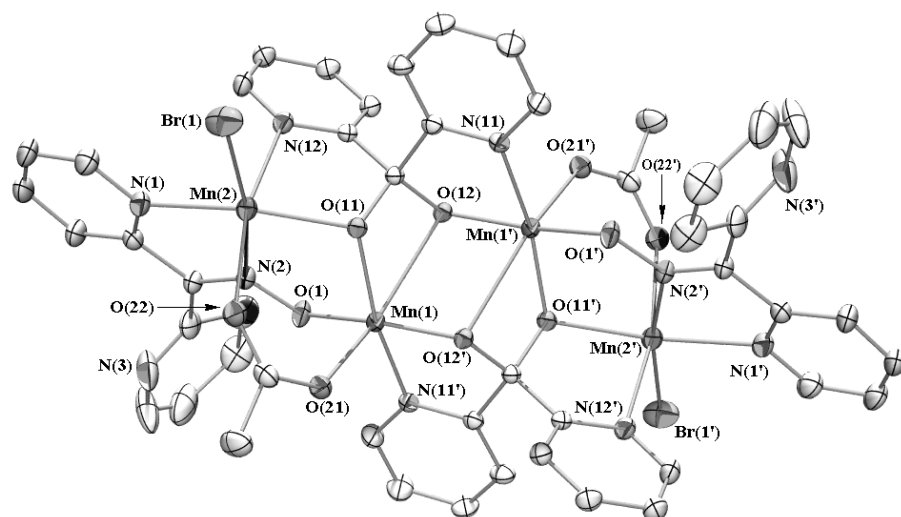

S2

Supplement: b412355g.pdf [file b412355g.pdf]
